# Supplementary material for: The Transcription Factor HaHB11 Boosts Grain Set and Yield in Rice Plants, Allowing Them to Approach Their Ideal Phenotype
Source: Biomolecules. 2023 May 12;13(5):826. doi: 10.3390/biom13050826 (PMC10216415; doi:10.3390/biom13050826)
Supplement: Supplementary file 1 [file biomolecules-13-00826-s001.zip › biomolecules-2301706-final-Supp Tables.xlsx]

## Sheet: Supp Table S1
	Date
	Campaign	Sowing	Fertilization		Waterlogging	Anthesis		Samples												Harvest
			1	2		KITAAKE/pH11	H11	KITAAKE/pH11						H11
	2017-2018	2018-01-05	2018-01-19	2018-02-28	2018-01-30	2018-02-23	2018-03-10	2018-02-16	2018-02-23	2018-03-28				2018-02-16	2018-03-10	2018-03-28				2018-03-28
	2018-2019	2018-12-06	2018-12-21	2019-01-30	2019-01-04	2019-01-28	2019-02-11	2019-01-04	2019-01-11	2019-01-30	2019-02-14	2019-03-19	2019-03-29	2019-01-04	2019-01-17	2019-02-14	2019-02-28	2019-03-19	2019-03-29	2019-03-29
	2019-2020	2019-11-06	2019-11-29	2020-01-03	2019-12-02	2019-12-30	2020-01-16	2019-12-13	2020-01-03	2020-01-30	2020-03-09			2019-12-13	2020-01-20	2020-02-05	2020-03-09			2020-03-09
	2020-2021	2020-11-27	2020-12-29	2021-01-31	2020-12-23	2021-01-25	2021-02-17	2021-01-19	2021-02-02	2021-03-04	2021-03-25	2021-04-04		2021-01-19	2021-02-02	2021-03-04	2021-03-25	2021-04-04		2021-04-04
	2021-2022	2021-11-16	2021-12-03	2022-01-05	2021-12-12	2022-01-11	2022-01-25	2022-12-23	2022-01-12	2022-01-28	2022-02-17	2022-03-11		2021-12-23	2022-01-12	2022-01-28	2022-02-17	2022-03-11		2022-03-11
	Days after sowing (DAS)
	Campaign	Sowing	Fertilization		Waterlogging	Anthesis		Samples												Harvest
			1	2		KITAAKE/pH11	H11	KITAAKE/pH11						H11
	2017-2018	2018-01-05	14	54	25	49	64	42	49	82				42	64	82				82
	2018-2019	2018-12-06	15	55	29	53	67	29	36	55	70	103	113	29	42	70	84	103	113	113
	2019-2020	2019-11-06	23	58	26	54	71	37	58	85	124			37	75	91	124			124
	2020-2021	2020-11-27	32	65	26	59	82	53	67	97	118	128		53	67	97	118	128		128
	2021-2022	2021-11-16	17	50	26	56	70	402	57	73	93	115		37	57	73	93	115		115
	Table S1
	Dates of sowing, waterlogging, anthesis, and harvesting of the five field assays performed with H11 plants and two with pH11 plants

## Sheet: Supp. Table S2
	Name	F/R	OliGo sequence 5' to 3'	Gene	Accesion number
	OsACT1	F	CTCCCCCATGCTATCCTTCG	Actin 1	LOC_Os03G50885
		R	TGAATGAGTAACCACGCTCCG	Actin 1	LOC_Os03G50885
	HaHB11	F	GGAGGAGCTAATTAAGGATGTAACG	HaHB11	Ha412T4l19912C0S1
		R	GCATAGTGCAAACAAACAGCAAGC	HaHB11	Ha412T4l19912C0S1
	OsAGO1	F	GACCAGCGTACTGTTGATAGA	AGO-1	LOC_Os04G47870.1
		R	CAAGTTGTTCGTGAGGGTTT	AGO-1	LOC_Os04G47870.1
	OsHox32/OsHB4	F	ACTGGATGGCAAGACGGATG	Hox32/HB4	LOC_Os03G43930.1
		R	GTCAGGACCGATCTTGTGTTG	Hox32/HB4	LOC_Os03G43930.1
	OsRoc5	F	CAGGAGATGACCCAGATCGC	Roc5	LOC_Os02G45250.1
		R	ACCGGAGCGTACACAACAAT	Roc5	LOC_Os02G45250.1
	OsPFL	F	AGCTGCGATTTCTGGAAGAG	PFL	LOC_Os06G35970.1
		R	CAGTCCTTGCGGGTGC	PFL	LOC_Os06G35970.1
	OsBRD1	F	TTCAATCCATGGAGGTGGCTGGAG	BRD-1	LOC_Os03G40540
		R	TTCAATCCATGGAGGTGGCTGGAG	BRD-1	LOC_Os03G40540
	OsDLT	F	AGGGCCCATTTGTTCTTGATCC	DLT-1	LOC_Os06G03710
		R	AGAATGGGTGGCTTCGCCTTAG	DLT-1	LOC_Os06G03710

## Sheet: Supp Table S3
	Campaign	Sowing date	Campaign	Genotype	Leaf biomass/plant (g/plant)			Tiller biomass/plant (g/plant)			Tiller biomass/ leaf biomass			Total biomass/plant (g/plant)			HI			Panicle biomass/plant (g/plant)			Number of panicles/plant (N°/plant)			Single panicle biomass (g/panicle)			100 grain weight (g)			Grain number/panicle (N°/panicle)			Branch number per panicle (N°/panicle)			Panicle length (cm)			Light interception (%)
	2017-2018	2018-05-01	2017-2018	Null segregant	0.558	±	0.221603	1.448	±	0.229634	2.78788	±	0.774565	4.95767	±	0.79501	0.583124	±	0.0174776	2.95167	±	0.426879	4.53333	±	0.832666	0.656832	±	0.0667982	1.99928			43.4667	±	4.7754							0.9
				Kitaake	0.890333	±	0.450744	1.50133	±	0.246358	2.7215	±	1.09951	5.60667	±	0.526432	0.57315	±	0.0111477	3.215	±	0.333483	4.23333	±	0.305505	0.761366	±	0.0845385	2.60333			39.2667	±	1.12151
				H11-1	1.06385	±	0.278133	1.84145	±	0.199254	1.53672	±	0.084128	6.62158	±	0.996993	0.560598	±	0.0185483	3.71627	±	0.601591	4.17879	±	0.528708	0.912096	±	0.0675753	2.64617			52.4	±	5.82866
				H11-2	1.38045	±	0.161615	2.34845	±	0.165282	1.70802	±	0.0890811	8.49182	±	0.399503	0.561423	±	0.0191945	4.76291	±	0.105379	5.28485	±	0.334063	0.936609	±	0.0746241	2.30433			45.0667	±	0.751295
				H11-3	0.862556	±	0.202851	1.71128	±	0.411911	1.99416	±	0.207532	6.46411	±	1.45097	0.602454	±	0.0120164	3.89028	±	0.855818	3.69596	±	0.657166	1.19434	±	0.113136	2.36383			49.9333	±	0.940449
				IRGA 417	1.89023	±	0.634802	3.36407	±	0.942275	1.79973	±	0.0932235	8.56157	±	2.84645	0.381851	±	0.0314397	3.30727	±	1.28768	2.15897	±	0.212248	1.71177	±	0.249166	2.56633			72	±	2.53333
	2018-2019	2018-06-12	2018-2019	Kitaake	0.370107	±	0.074321	1.82136	±	0.43513	4.91005	±	0.515244	3.94347	±	1.0234	0.432225	±	0.0193877	1.56965	±	0.149989	4.8052	±	0.412524	0.359626	±	0.0812701	2.36	±	0.192873	20.2444	±	0.924501							0.7
				H11-1	0.423389	±	0.0770053	1.13565	±	0.240352	2.67183	±	0.115585	3.89514	±	0.893811	0.596528	±	0.0306542	2.3361	±	0.24668	3.73895	±	0.690107	0.618212	±	0.0604728	2.35	±	0.278747	36.9111	±	1.41451
				H11-2	0.519344	±	0.0918102	1.67844	±	0.762346	3.15336	±	1.25089	4.16023	±	1.15136	0.488127	±	0.110537	1.96245	±	0.171797	4.77898	±	0.680264	0.422728	±	0.0403471	2.403	±	0.280929	25.5556	±	1.56559
				H11-3	0.443379	±	0.0596479	1.5551	±	0.242826	3.40591	±	0.194885	3.93505	±	0.879157	0.481342	±	0.0533213	1.8404	±	0.238995	4.43025	±	0.35222	0.419227	±	0.0839522	2.58667	±	0.365103	25.4	±	1.47792
				IRGA 417	0.977308	±	0.0320918	2.3049	±	0.212822	2.36326	±	0.295366	5.66435	±	0.8688	0.41613	±	0.0576475	2.38215	±	0.688069	2.54718	±	0.393083	0.967574	±	0.419446	2.15			64.7333	±	15.1302
	2019-2020	2019-06-11	2019-2020	Kitaake	0.497256	±	0.0454184	2.20248	±	0.136782	4.57577	±	0.197038	4.77485	±	0.153738	0.497243	±	0.00541688	2.36701	±	0.0919693	4.69172	±	0.393694	0.640258	±	0.0519816				41.2683	±	1.46422	4.80488	±	0.144912	9.54167	±	0.304377	0.9
				H11-1	0.527474	±	0.0307337	1.19328	±	0.0490224	2.29921	±	0.0780195	4.49287	±	0.147698	0.615245	±	0.0103203	2.77212	±	0.102072	3.38318	±	0.195446	0.785812	±	0.0266035				52.3514	±	1.54668	7.21053	±	0.239005	13.1	±	0.397013
				H11-2	0.645721	±	0.0507576	1.96777	±	0.116617	3.132	±	0.150789	5.61964	±	0.305241	0.536095	±	0.00793959	3.00615	±	0.154881	4.39503	±	0.232378	0.734342	±	0.0468086
				H11-3	0.526727	±	0.0367289	1.19243	±	0.0607517	2.3022	±	0.059502	4.5664	±	0.195263	0.624248	±	0.012609	2.84724	±	0.12555	3.42834	±	0.156406	0.839302	±	0.0261065				51.7429	±	1.07636	7.74286	±	0.184905	13.0857	±	0.19606
	2020-2021	11/27/2020	2020-2021	KITAAKE	0.251869	±	0.00699847	1.28172	±	0.0573775	5.09294	±	0.087125	2.92983	±	0.128829	0.476639	±	0.00509796	1.39624	±	0.0641478	4.05028	±	0.168366	0.427646	±	0.0117553	2.76			34.1667	±	1.31693	4.29167	±	0.175276	9.22917	±	0.167514	0.5
				H11-1	0.443443	±	0.0165265	1.17471	±	0.062267	2.67949	±	0.0756327	3.8898	±	0.234783	0.579854	±	0.0106251	2.27165	±	0.161987	2.93029	±	0.131565	0.799373	±	0.0532134	2.79			54.8095	±	3.3923	6.5	±	0.170941	11.7381	±	0.503108
				H11-3	0.401583	±	0.0148962	1.09615	±	0.0489187	2.7466	±	0.0615127	3.58736	±	0.162296	0.582517	±	0.00582088	2.08963	±	0.100054	2.90099	±	0.176891	0.743386	±	0.0201347	2.7			49.875	±	1.62778	6.41667	±	0.133469	12.3125	±	0.358404
				H11:H11-2	0.23541	±	0.00922743	1.38439	±	0.0963148	5.91258	±	0.188877	2.68456	±	0.253977	0.38812	±	0.0205027	1.06476	±	0.145123	4.52779	±	0.28434	0.320861	±	0.0254044	2.86			31.0833	±	1.49979	4.66667	±	0.224733	9.04167	±	0.199035
				H11:H11-3	0.253344	±	0.00382808	1.41788	±	0.122649	5.54927	±	0.309296	3.05471	±	0.176156	0.455797	±	0.0141087	1.38349	±	0.0610324	4.80482	±	0.265356	0.430911	±	0.0140221	2.83			29.5833	±	1.57854	4.16667	±	0.207194	9.29167	±	0.249684
	2021-2022	11/16/2021	2021-2022	Kitaake	0.372991	±	0.0216205	2.04692	±	0.149993	5.44072	±	0.107728	3.91753	±	0.279279	0.380949	±	0.0117076	1.49762	±	0.120025	5.50386	±	0.303751	0.41278	±	0.0210172	2.88			17.7	±	1.22972	3.7	±	0.260342	9.05	±	0.273354	0.5
				H11-1	0.528349	±	0.0178519	1.27774	±	0.0555965	2.40567	±	0.0455506	4.43584	±	0.248306	0.586828	±	0.0100715	2.62975	±	0.184227	3.33017	±	0.121494	0.788348	±	0.0322811	2.65			34.5	±	3.13847	6.1	±	0.378594	12.05	±	0.491313
				H11-3	0.541426	±	0.0416125	1.43037	±	0.110233	2.71766	±	0.203211	4.67349	±	0.354745	0.57262	±	0.0124469	2.7017	±	0.236446	3.37857	±	0.184036	0.801338	±	0.0315857	2.74			41	±	2.83627	7.1	±	0.276887	12.9	±	0.314466
				H11:H11-2	0.43632	±	0.0441717	2.46454	±	0.220767	5.71248	±	0.136275	4.65672	±	0.409977	0.377152	±	0.0155273	1.75585	±	0.181389	6.66177	±	0.672868	0.405483	±	0.0204938	3.27			17.1	±	1.26886	3.9	±	0.233333	10.2	±	0.309121
				H11:H11-3	0.402904	±	0.0123072	2.29621	±	0.080928	5.69516	±	0.052996	4.23699	±	0.137426	0.362946	±	0.00799779	1.53788	±	0.0614915	6.38414	±	0.189038	0.380963	±	0.0187809	2.89			18.3	±	0.882547	3.8	±	0.133333	9.4	±	0.208167
				Table S3.
				The Table shows the sowing date and the data corresponding to all the evaluated traits, including light interception for five and two campaigns performed with H11 and pH11 genotypes, respectively. The means and SEM for each parameter are indicated on the right of each column.

## Sheet: Supp Table S4
			GENOTYPE	LB	TB	TB/LB	B	HI	PB	NP	SPB	GW	GNP	BNP	PL		LB	Leaf biomass/plant
		p<0,1	Control	ab	a	a	a	a	a	ab	a	-	a	a	a		TB	Tiller biomass/plant
			H11	b	a	b	ab	c	b	b	b	-	b	b	b		TB/LB	Tiller biomass/leaf biomass
			pH11	a	a	a	a	b	a	a	ab	-	a	a	a		B	Total biomass/plant
			IRGA	c	b	c	b	ab	b	c	c	-	c	-	-		HI	Harvest index
																	PB	Panicle biomass/plant
			GENOTYPE (compared with control)	LB	TB	TB/LB	B	HI	PB	NP	SPB	GW	GNP	BNP	PL		NP	Number of panicles/plant
		p<0,1 * p<0,05 ** p<0,01 ***	H11	-	-	***	-	***	*	-	*	-	*	***	***		SPB	Single panicle biomass
			pH11	-	-	-	-	***	-	*		-	-	-	-		GW	100 grain weight
			IRGA	**	**	***	***	-	-	***	***	-	***	-	-		GNP	Grain number/panicle
																	BNP	Branch number per panicle
																	PL	Panicle length
		The data shown correspond to the analysis of the campaigns carried out with H11 and pH11 genotypes during the seasons 2017-2018, 2018-2019, 2019-2020, 2020-2021, and 2021-2022.
		Three biological replicates per genotype (H11, pH11, IRGA417, and control), and campaign were evaluated. An ANOVA analysis was performed considering the campaign and each event for H11 or pH11 lines. Then, taking the genotype as the classification variable and each of the traits as the dependent variable, data were compared using Tukey (p-values ("p<0,1 *; p<0,05 **, and p<0,01 ***"). IRGA 417 is…
